# Supplementary material
Source: PubMed Central journal article supplement (PMC4113172)
Supplement: supp_dc13-2471v132471_DC132471SupplementaryData.pdf [file supp_dc13-2471v132471_DC132471SupplementaryData.pdf]

## SUPPLEMENTARY DATA

### ***Pennington Biomedical Research Center (Baton Rouge, LA)***

George A. Bray, MD\*

Annie Chatellier, RN, CCRC\*\*

Crystal Duncan, LPN

Frank L. Greenway, MD

Erma Levy, RD

Donna H. Ryan, MD

### ***University of Chicago (Chicago, IL)***

Kenneth S. Polonsky, MD\*

Janet Tobian, MD, PhD\*

David Ehrmann, MD\*

Margaret J. Matulik, RN, BSN\*\*

Bart Clark, MD

Kirsten Czech, MS

Catherine DeSandre, BA

Ruthanne Hilbrich, RD

Wylie McNabb, EdD

Ann R. Semenske, MS, RD

### ***Jefferson Medical College (Philadelphia, PA)***

Barry J. Goldstein, MD, PhD\*

Kevin Furlong, DO\*

Kellie A. Smith, RN, MSN\*\*

Wendi Wildman, RN\*\*

Constance Pepe, MS, RD

### ***University of Miami (Miami, FL)***

Ronald B. Goldberg, MD\*

Jeanette Calles, MEd\*\*

Juliet Ojito, RN\*\*

Sumaya Castillo-Florez, MPH

Hermes J. Florez, MD, PhD

Anna Giannella, RD, MS

Olga Lara

Beth Veciana

### ***The University of Texas Health Science Center (San Antonio, TX)***

Steven M. Haffner, MD, MPH\*

Helen P. Hazuda, PhD\*

Maria G. Montez, RN, MSHP, CDE\*\*

Carlos Lorenzo, MD, PhD

Arlene Martinez, RN, BSN, CDE

### ***University of Colorado (Denver, CO)***

Richard F. Hamman, MD, DrPH\*

Lisa Testaverde, MS\*\*

Alexis Bouffard, MA, RN, BSN

Dana Dabelea, MD, PhD

Tonya Jenkins, RD, CDE

Dione Lenz, RN, BSN, CDE

Leigh Perreault, MD

David W. Price, MD

Sheila C. Steinke, MS

### ***Joslin Diabetes Center (Boston, MA)***

Edward S. Horton, MD\*

Catherine S. Poirier, RN, BSN\*\*

Kati Swift, RN, BSN\*\*

Enrique Caballero, MD

Barbara Fagnoli, RD

Ashley Guidi, BS

Mathew Guido, BA

Sharon D. Jackson, MS, RD, CDE

Lori Lambert, MS, RD, LD

Kathleen E. Lawton, RN

Sarah Ledbury, Med, RD

Jessica Sansoucy, BS

Jeanne Spellman, RD

### ***VA Puget Sound Health Care System and University of Washington (Seattle, WA)***

Steven E. Kahn, MB, ChB\*

Brenda K. Montgomery, RN, BSN, CDE\*\*

Wilfred Fujimoto, MD

Robert H. Knopp, MD

Edward W. Lipkin, MD

Michelle Marr, BA

Anne Murillo, BS

Dace Trence, MD

### ***University of Tennessee (Memphis, TN)***

Abbas E. Kitabchi, PhD, MD, FACP\*

Mary E. Murphy, RN, MS, CDE, MBA\*\*

William B. Applegate, MD, MPH

Michael Bryer-Ash, MD

Samuel Dagogo-Jack, MD, MSc, FRCP, FACP

Sandra L. Frieson, RN

Helen Lambeth, RN, BSN

Lynne C. Lichtermann, RN, BSN

Hooman Otkaei, MD

Lily M.K. Rutledge, RN, BSN

Amy R. Sherman, RD, LD

Clara M. Smith, RD, MHP, LDN

Judith E. Soberman, MD

Beverly Williams-Cleaves, MD

### ***Northwestern University's Feinberg School of Medicine (Chicago, IL)***

Boyd E. Metzger, MD\*

Mark E. Molitch, MD\*

Mariana K. Johnson, MS, RN\*\*

Mimi M. Giles, MS, RD

Diane Larsen, BS

Charlotte Niznik, MS, RN, CDE

## SUPPLEMENTARY DATA

Samsam C. Pen, BA  
Pamela A. Schinleber, RN, MS  
**Massachusetts General Hospital (Boston, MA)**  
David M. Nathan, MD\*  
Charles McKittrick, BSN\*\*  
Heather Turgeon, BSN\*\*  
Kathy Abbott  
Ellen Anderson, MS, RD  
Laurie Bissett, MS, RD  
Enrico Cagliero, MD  
Kali D'Anna  
Linda Delahanty, MS, RD  
Jose C. Florez, MD, PhD<sup>+</sup>  
Valerie Goldman, MS, RD  
Alexandra Poulos  
Beverly Tseng  
**University of California-San Diego (San Diego, CA)**  
Elizabeth Barrett-Connor, MD\*  
Mary Lou Carrion-Petersen, RN, BSN\*\*  
Javiva Horne, RD  
Diana Leos, RN, BSN  
Sundar Mudaliar, MD  
Jean Smith, RN  
Karen Vejvoda, RN, BSN, CDE, CCRC  
**St. Luke's-Roosevelt Hospital (New York, NY)**  
F. Xavier Pi-Sunyer, MD\*  
Jane E. Lee, MS\*\*  
Sandra T. Foo, MD  
Susan Hagamen, MS, RN, CDE  
**Indiana University (Indianapolis, IN)**  
David G. Marrero, PhD\*  
Susie M. Kelly, RN, CDE\*\*  
Ronald T. Ackermann, MD  
Edwin S. Fineberg, MD  
Angela Hadden  
Marcia A. Jackson  
Marion S. Kirkman, MD  
Kieren J. Mather, MD  
Paris J. Roach, MD  
Madelyn L. Wheeler, RD  
**Medstar Research Institute (Washington, DC)**  
Robert E. Ratner, MD\*  
Vanita Aroda, MD\*  
Sue Shapiro, RN, BSN, CCRC\*\*  
Catherine Bavido-Arrage, MS, RD, LD

Peggy Gibbs  
Gabriel Uwaifo, MD  
Renee Wiggins, RD  
**University of Southern California/UCLA Research Center (Alhambra, CA)**  
Mohammed F. Saad, MD\*  
Karol Watson, MD\*  
Medhat Botrous, MD\*\*  
Sujata Jinagouda, MD\*\*  
Maria Budget  
Claudia Conzues  
Perpetua Magpuri  
Kathy Ngo  
Kathy Xaphthalmous  
**Washington University (St. Louis, MO)**  
Neil H. White, MD, CDE\*  
Samia Das, MS, MBA, RD, LD\*\*  
Ana Santiago, RD  
Angela L. Brown, MD  
Cormarie Wernimont, RD, LD  
**Johns Hopkins School of Medicine (Baltimore, MD)**  
Christopher D. Saudek, MD\* (deceased)  
Sherita Hill Golden, MD, MHS, FAHA\*  
Tracy Whittington, BS\*\*  
Jeanne M. Clark, MD  
Alicia Greene  
Dawn Jiggetts  
Henry Mosley  
John Reusing  
Richard R. Rubin, PhD  
Shawne Stephens  
Evonne Utsey  
**University of New Mexico (Albuquerque, NM)**  
David S. Schade, MD\*  
Karwyn S. Adams, RN, MSN\*\*  
Claire Hemphill, RN, BSN\*\*  
Penny Hyde, RN, BSN\*\*  
Lisa Butler, BUS  
Janene L. Canady, RN, CDE  
Kathleen Colleran, MD  
Ysela Gonzales, RN, MSN  
Doris A. Hernandez-McGinnis  
Patricia Katz, LPN  
Carolyn King  
**Albert Einstein College of Medicine (Bronx, NY)**  
Jill Crandall, MD\*

## SUPPLEMENTARY DATA

Janet O. Brown, RN, MPH, MSN\*\*

Elsie Adorno, BS

Helena Duffy, MS, C-ANP

Helen Martinez, RN, MSN, FNP-C

Dorothy Pompei, BA

Harry Shamoon, MD

Elizabeth A. Walker, RN, DNSc, CDE

Judith Wylie-Rosett, EdD, RD

***University of Pittsburgh (Pittsburgh, PA)***

Trevor Orchard, MD\*

Susan Jeffries, RN, MSN\*\*

M. Kaye Kramer, BSN, MPH\*\*

Marie Smith, RN, BSN\*\*

Rena R. Wing, PhD

Andrea Kriska, PhD

Jessica Pettigrew, CMA

Linda Semler, MS, RD

Elizabeth Venditti, PhD

Valarie Weinzierl, BS

***University of Hawaii (Honolulu, HI)***

Richard F. Arakaki, MD\*

Narleen K. Baker-Ladao, BS\*\*

Mae K. Isonaga, RD, MPH\*\*

Nina E. Bermudez, MS

Marjorie K. Mau, MD

***Southwest American Indian Centers***

**(Phoenix, AZ; Shiprock, NM; Zuni, NM)**

William C. Knowler, MD, DrPH\*<sup>+</sup>

Norman Coeate\*\*

Mary A. Hoskin, RD, MS\*\*

Camille Natewa\*\*

Carol A. Percy, RN, MS\*\*

Kelly J. Acton, MD, MPH

Vickie L. Andre, RN, FNP

Shandiin Begay, MPH

Brian C. Bucca, OD, FAAO

Sherron Cook

Matthew S. Doughty, MD

Justin Glass, MD

Martia Glass, MD

Robert L. Hanson, MD, MPH

Doug Hassenpflug, OD

Louise E. Ingraham, MS, RD, LN

Kathleen M. Kobus, RNC-ANP

Jonathan Krakoff, MD

Catherine Manus, LPN

Cherie McCabe

Sara Michaels, MD

Tina Morgan

Julie A. Nelson, RD

Robert J. Roy

Miranda Smart

Darryl P. Tonemah, PhD

Charlton Wilson, MD

***George Washington University Biostatistics Center (DPP Coordinating Center Rockville, MD)***

Sarah Fowler, PhD\*

Tina Brenneman\*\*

Solome Abebe, MS

Julie Bamdad, MS

Melanie Barkalow

Joel Bethupu

Tsedenia Bezabeh

Jackie Callaghan

Costas Christophi, PhD

Nicole Butler

Sharon L. Edelstein, ScM

Mary Foulkes, PhD

Yuping Gao

Robert Gooding

Adrienne Gottlieb

Nisha Grover

Heather Hoffman, PhD

Kathleen Jablonski, PhD

Richard Katz, MD

Preethy Kolinjivadi, MS

John M. Lachin, ScD

Yong Ma, PhD

Qing Pan, PhD

Susan Reamer

Alla Sapozhnikova

Hanna Sherif, MS

Marinella Temprosa, PhD

***Lifestyle Resource Core***

Elizabeth M. Venditti, PhD\*

Andrea M. Kriska, PhD

Linda Semler, MS, RD

Valerie Weinzierl, BS

***Central Biochemistry Laboratory (Seattle, WA)***

Santica Marcovina, PhD, ScD\*

Greg Strylewicz, PhD\*\*

John Albers, PhD

***Epidemiological Cardiology Research Center-Epicare (Winston-Salem, NC)***

Ronald J. Prineas, MD, PhD\*

Teresa Alexander

## SUPPLEMENTARY DATA

Charles Campbell, MS  
Sharon Hall  
Susan Hensley  
Yabing Li, MD  
Margaret Mills  
Elsayed Soliman, MD  
Zhuming Zhang, MD

### ***Fundus Photo Reading Center (Madison, WI)***

Ronald Danis, MD\*  
Matthew Davis, MD\*  
Larry Hubbard\*  
Ryan Endres\*\*  
Deborah Elsas\*\*  
Samantha Johnson\*\*  
Vonnie Gama  
Anne Goulding

### ***Carotid Ultrasound***

Gregory Evans

### ***CT Scan Reading Center***

Elizabeth Stamm

### ***Neurocognitive Assessment Group***

Jose A. Luchsinger, MD, MPH

### ***NIH/NIDDK (Bethesda, MD)***

Judith Fradkin, MD  
Sanford Garfield, PhD

### ***Centers for Disease Control & Prevention (Atlanta, GA)***

Edward Gregg, PhD  
Ping Zhang, PhD

### ***University of Michigan (Ann Arbor, MI)***

William H. Herman, MD, MPH  
Morton B. Brown, PhD

### ***Nutrition Coding Center (Columbia, SC)***

Elizabeth Mayer-Davis, PhD\*  
Robert R. Moran, PhD\*\*

### ***Quality of Well-Being Center (La Jolla, CA)***

Ted Ganiats, MD\*  
Andrew J. Sarkin, PhD\*\*  
Naomi Katzir  
Erik Groessl, PhD

### ***Coronary Artery Calcification Reading Center***

Matthew Budoff, MD  
Chris Dailing

### ***\*Genetics Working Group***

Jose C. Florez, MD, PhD<sup>1,2</sup>  
David Altshuler, MD, PhD<sup>1,2</sup>  
Liana K. Billings, MD<sup>1</sup>  
Ling Chen, MS<sup>1</sup>  
Maegan Harden, BS<sup>2</sup>

Robert L. Hanson, MD, MPH<sup>3</sup>  
William C. Knowler, MD, DrPH<sup>3</sup>  
Toni I. Pollin, PhD<sup>4</sup>  
Alan R. Shuldiner, MD<sup>4</sup>  
Kathleen Jablonski, PhD<sup>5</sup>  
Paul W. Franks, PhD, MPhil, MS<sup>6,7,8</sup>  
Marie-France Hivert, MD<sup>9</sup>

1=Massachusetts General Hospital

2=Broad Institute

3=NIDDK

4=University of Maryland

5=Coordinating Center

6=Lund University, Sweden

7=Umeå University, Sweden

8=Harvard School of Public Health

9=Université de Sherbrooke

\* denotes Principal Investigator

\*\* denotes Program Coordinator
